# Supplementary material for: Synthesis of dicobalt hexacarbonyl 5-p-tolylethynyl-2′-deoxyuridineElectronic supplementary information (ESI) available: experimental section, NMR and mass spectra and cyclic voltammograms. See http://www.rsc.org/suppdata/cc/b1/b109501c/
Source: Royal Society of Chemistry journal article supplement (doi:10.1039/b109501c), 2002-01-30

# SUPPORTING INFORMATION

## Synthesis of dicobalt hexacarbonyl 5-*p*-tolylethynyl-2'-deoxyuridine

Noor Esho, Brian Davies, Janet Lee, and Roman Dembinski\*

*Department of Chemistry and Center for Biomedical Research, Oakland University, 2200 N. Squirrel Rd., Rochester, MI 48309-4477*

### Experimental Section

**General:** Commercial chemicals were treated as follows: DMF, distilled from  $\text{CaH}_2$  and degassed (freeze and thaw) three times prior to use;  $\text{Et}_3\text{N}$ , distilled from  $\text{P}_2\text{O}_5$ ; THF distilled from Na/benzophenone;  $(\text{CH}_3\text{CO})_2\text{O}$  distilled prior to use. 5-Iodo-2'-deoxyuridine (Berry&Associates), HC C-*p*- $\text{C}_6\text{H}_4\text{Me}$  (Aldrich, Lancaster),  $\text{Pd}(\text{PPh}_3)_4$  and CuI 99.999% (Aldrich), *n*- $\text{Bu}_4\text{NI}$  (Avocado),  $\text{Ph}_3\text{P}$  (Fluka),  $\text{Co}_2(\text{CO})_8$  (Acros), silica gel (J. T. Baker, 60-200 mesh), preparative plates (Analtech,  $20 \times 20$  cm 1000  $\mu$ ), TLC plates Analtech GF, cat. number 2521 or Merck 60, cat. number 5715 used as received. Other materials not listed were used as received.

IR and UV-visible spectra were recorded on a Bio Rad FTS-175C/ FTS-375C and Cary 50 spectrometers. Fluorescence measurements were carried out on a Amico-Bowman Series 2 Luminescence Spectrometer, cells 1 and 3 mL, bandwidths 4 nm each, PMT 650 V (24 °C). NMR spectra were obtained on a Bruker BVT-3300 spectrometer ( $^1\text{H}$  of 200 MHz, and  $^{13}\text{C}$  of 50 MHz). Mass spectra were recorded on a Finnigan MAT 95 high resolution instrument. Differential scanning calorimetry (DSC) were obtained on a DuPont Automotive 912 DS Calorimeter. Samples (2-3 mg) were loaded in crimped Al pans and heated to 250 °C at 10 °C/min under  $\text{N}_2$ . Microanalyses were conducted by Atlantic Microlab. M.p. were recorded on Büchi or Gallen Kamp apparatus. For cyclic voltammetry an EG&G Princeton Applied Research Model 283 potentiostat with the 270/250 Research Electrochemistry Software 4.30 was employed. Cells were fitted with Pt working (2.0-1.6  $\text{mm}^2$ ) and counter electrodes, and a Ag wire pseudoreference electrode. All  $\text{CH}_2\text{Cl}_2$  solutions were 7-

$9 \times 10^{-3}$  M in substrate, 0.1 M in  $n\text{-Bu}_4\text{N}^+ \text{BF}_4^-$  (crystallized from ethanol/hexane and dried by oil pump vacuum), and prepared under nitrogen. Ferrocene was subsequently added,<sup>S1</sup> and calibration voltammograms recorded. The ambient laboratory temperature was  $22.5 \pm 1$  °C.

### **3',5'-di-*O*-acetyl-5-iodo-2'-deoxyuridine (1b).**<sup>S2</sup>

A round bottom flask was charged with 5-iodo-2'-deoxyuridine (1.000 g, 2.824 mmol), pyridine (15 mL), and  $(\text{CH}_3\text{CO})_2\text{O}$  (3.0 mL, 28 mmol). The reaction was stirred for 16 h. The solvent was removed by rotary evaporation. The residue was coevaporated with benzene/ $\text{CH}_2\text{Cl}_2$  (10/10 mL), and  $\text{CH}_2\text{Cl}_2$  ( $2 \times 10$  mL). The residue was dissolved in  $\text{CH}_2\text{Cl}_2$  (250 mL), and washed with  $\text{NaHCO}_3$  (0.5 M,  $4 \times 50$  mL). The organic phase was dried over  $\text{Na}_2\text{SO}_4$  and filtered. Solvent was removed by rotary evaporator. The residue was precipitated from ethanol (ca. 1.5 mL) and was kept at -20 °C (freezer) for 24 h. A white powder was collected by filtration and dried on an oil vacuum pump to give **1b** (1.0853 g, 2.4769 mmol, 88%).  $R_f = 0.30$  ( $\text{CHCl}_3/\text{CH}_3\text{OH}$ )<sup>S3a</sup>

NMR ( $\text{CDCl}_3$ ):<sup>S4</sup>  $^1\text{H}$  ( , 200 MHz) 8.92 (br s, 1H, N3), 7.98 (s, 1H, H6), 6.30 (dd,  $J = 8.2, 5.7$  Hz, 1H, H1'), 5.26 (dt,  $J = 6.5, 2.1$  Hz, 1H, H3'), 4.40 and 4.37 (2d,  $J = 3.0$  and 2.8 Hz, 2H, H5'), 4.33-4.28 (m, 1H, H4'), 2.59 and 2.52 (2dd,  $J = 5.7, 2.0$  and 5.7, 2.0 Hz, 2H, H2'), 2.22 and 2.13 (2s,  $2 \times 3\text{H}$ , 2  $\text{COCH}_3$ );  $^{13}\text{C}$  (ppm, 50 MHz)<sup>S5</sup> 170.4 and 170.3 (2  $\text{COCH}_3$ ), 160.0 (d,  $J = 9.6$  Hz, C4), 150.1 (d,  $J = 7.7$  Hz, C2), 143.9 (dd,  $J = 184.9, 3.0$  Hz, C6), 85.7 (dm,  $J = 171.6$  Hz, C1'), 82.5 (dm,  $J = 151.7$  Hz, C4'), 74.2 (dm,  $J = 158.3$  Hz, C3'), 69.2 (d,  $J = 4.9$  Hz, C5), 64.0 (t,  $J = 149.1$  Hz, C5'), 38.5 (dd,  $J = 138.5, 132.2$  Hz, C2'), 21.3 (q,  $J = 129.9$  Hz,  $\text{COCH}_3$ ), 21.1 (q,  $J = 130.1$  Hz,  $\text{COCH}_3$ ).

### **5-*p*-tolylethynyl-2'-deoxyuridine (2a).**

A Schlenk flask was charged with 5-iodo-2'-deoxyuridine (0.600 g, 1.70 mmol),  $\text{Ph}_3\text{P}$  (0.445 g, 1.70 mmol),  $n\text{-Bu}_4\text{NI}$  (0.631 g, 1.71 mmol),  $\text{Pd}(\text{PPh}_3)_4$  (0.216 g, 0.187 mmol), DMF (10 mL),  $\text{Et}_3\text{N}$  (0.47 mL, 3.4 mmol), 4-ethynyltoluene (0.25 mL, 2.0 mmol), and  $\text{CuI}$  (0.0323 g, 0.170 mmol). The orange-brown mixture was stirred for 2.5 h at room temperature. Solvent was removed by oil pump vacuum and the residue was extracted with  $\text{CH}_3\text{OH}$  (10 mL). The solid was filtered off and washed with  $\text{CH}_3\text{OH}$  ( $3 \times 10$  mL). The solvent was removed from combined filtrates by rotary evaporation. The residue was dried by oil pump vacuum for 20 min, dissolved in  $\text{CHCl}_3$  (15 mL), and kept at -15 °C

(freezer) for 26 h. The precipitate was filtered off and washed with cold  $\text{CHCl}_3$  ( $3 \times 10$  mL). Silica gel column chromatography ( $40 \times 2$  cm;  $\text{CHCl}_3/\text{CH}_3\text{OH}^{\text{S3b}}$ ) gave a colorless fraction (purple fluorescence on TLC). Solvent was removed by rotary evaporator and the residue dried by oil pump vacuum to give **2a** (0.488 g, 1.43 mmol, 84%) as a white powder. DSC ( $T_i/T_e/T_p$ )<sup>S6</sup> 181/192/209 °C. Calcd for  $\text{C}_{18}\text{H}_{18}\text{N}_2\text{O}_5$ : C, 63.15; H, 5.30. Found: C, 62.73; H, 5.58.  $R_f = 0.60$  ( $\text{CHCl}_3/\text{CH}_3\text{OH}$ ).<sup>S3b</sup> IR ( $\text{cm}^{-1}$ , KBr)  $\text{NH}$  3433 s br,  $\text{OH}$  3190 m br,  $\text{C}=\text{C}$  2220 vw,  $\text{C}=\text{O}$  1722 vs, 1669 vs, 1652 vs,  $\text{C}=\text{C}$  1618 m,  $p\text{-C}_6\text{H}_4$  817 m. UV-vis ( $\text{CH}_3\text{OH}$ ,  $5.5 \times 10^{-5}$  M)<sup>S8</sup> 252 (9500), 266 (11000), 280 (9900), 311 (12000). Fluorescence ( $\text{CH}_3\text{OH}$ ,  $6.1 \times 10^{-6}$  M)  $\lambda_{\text{em}} = 401$  nm ( $\lambda_{\text{ex}} = 311$  nm). MS<sup>S7</sup> (FAB, gly, positive) 435 ( $(\text{M} + \text{gly} + 1)^+$ , 10%), 343 ( $(\text{M} + 1)^+$ , 42%), 227 ( $(\text{M} - \text{C} \text{CC}_6\text{H}_4\text{CH}_3)^+$ , 100%); no other peaks above 200 of >6%; (negative) 433 ( $(\text{M} + \text{gly} - 1)^-$ , 13%), 341 ( $(\text{M} - 1)^-$ , 65%), 227 ( $(\text{M} - \text{C} \text{CC}_6\text{H}_4\text{CH}_3 - 2)^-$ , 100%); no other peaks above 200 of >9%. NMR ( $\text{DMSO}-d_6$ ):  $^1\text{H}$  ( $\delta$ , 200 MHz) 11.68 (s, 1H, N3),<sup>S9</sup> 8.33 (s, 1H, H6), 7.35 (AB,  $J = 8.1$  Hz, 2H,  $m\text{-C}_6\text{H}_4\text{CH}_3$ ),<sup>S10</sup> 7.21 (AB,  $J = 8.1$  Hz, 2H,  $o\text{-C}_6\text{H}_4\text{CH}_3$ ), 6.13 (t,  $J = 6.5$  Hz, 1H, H1'), 5.27 (d,  $J = 3.8$  Hz, 1H, OH3'),<sup>S9</sup> 5.17 (t,  $J = 4.3$  Hz, 1H, OH5'),<sup>S9</sup> 4.26 (q,  $J = 4.2$  Hz, 1H, H3'), 3.81 (q,  $J = 3.6$  Hz, 1H, H4'), 3.71-3.52 (m, 2H, H5'), 2.33 (s, 3H,  $\text{CH}_3$ ), 2.16 (t,  $J = 5.6$  Hz, 2H, H2');  $^{13}\text{C}$  (ppm, 50 MHz) 162.1 (d,  $J = 9.3$  Hz, C4), 149.9 (d,  $J = 7.5$  Hz, C2), 143.6 (dd,  $J = 181.2, 2.2$  Hz, C6), 138.3 (m,  $i\text{-C}_6\text{H}_4\text{CH}_3$ ), 131.1 (dd,  $J = 162.3, 6.2$  Hz,  $m\text{-C}_6\text{H}_4\text{CH}_3$ ), 129.4 (dq,  $J = 159.6, 5.4$  Hz,  $o\text{-C}_6\text{H}_4\text{CH}_3$ ), 119.5 (t,  $J = 8.2$  Hz,  $p\text{-C}_6\text{H}_4\text{CH}_3$ ), 98.3 (s, C5), 91.8 (t,  $J = 5.4$  Hz, C  $\text{CC}_6\text{H}_4$ ), 87.6 (d,  $J = 147.9$  Hz, C4'), 84.8 (d,  $J = 170.8$  Hz, C1'), 82.1 (d,  $J = 5.5$  Hz, C  $\text{CC}_6\text{H}_4$ ), 69.9 (d,  $J = 148.0$  Hz, C3'), 60.9 (t,  $J = 140.4$  Hz, C5'), 40.2 (t,  $J = 133.5$  Hz, C2'), 21.1 (qt,  $J = 126.2, 4.3$  Hz,  $\text{CH}_3$ ).

### **3',5'-di-*O*-acetyl-5-*p*-tolylethynyl-2'-deoxyuridine (2b).**

A Schlenk flask was charged with 3',5'-di-*O*-acetyl-5-iodo-2'-deoxyuridine (0.176 g, 0.402 mmol), 4-ethynyl toluene (0.060 mL, 0.47 mmol), triethylamine (0.11 mL, 0.83 mmol), DMF (10 mL),  $\text{Pd}(\text{PPh}_3)_4$  (0.0511 g, 0.0442 mmol), and CuI (0.0794 g, 0.417 mmol). The mixture was stirred at room temperature for 5 h. The solvent was removed by oil pump vacuum at 50 °C (water bath) and the residue was coevaporated with MeOH. The residue was dissolved in a minimum amount of  $\text{CHCl}_3/\text{MeOH}^{\text{S3c}}$  and filtered over a silica gel column ( $15 \times 2$  cm). The solvent was removed by

rotary evaporator. Silica gel column chromatography (hexane/EtOAc gradient, 80:20->65:35->50:50, 35 × 2 cm) gave **2b** as a white powder (0.0646 g, 0.157 mmol, 77%), m.p. 158-160 °C.  $R_f = 0.44$  ( $\text{CHCl}_3/\text{MeOH}$ ),<sup>S3a</sup> 0.44 (hexane/EtOAc).<sup>S3d</sup> IR ( $\text{cm}^{-1}$ ,  $\text{CHCl}_3$ )  $\text{NH}$  3384 w,  $\text{C}=\text{C}$  2224 vw,  $\text{C}=\text{O}$  1744 s, 1719 vs, 1702 vs,  $\text{C}=\text{C}$  1629 vw,  $p\text{-C}_6\text{H}_4$  819 vw. NMR ( $\text{CDCl}_3$ ):<sup>S4</sup>  $^1\text{H}$  (400 MHz) 9.94 (br s, 1H, N3), 7.85 (s, 1H, H6), 7.34 (AB,  $J = 8.1$  Hz, 2H,  $m\text{-C}_6\text{H}_4\text{CH}_3$ ),<sup>S10</sup> 7.11 (AB,  $J = 8.1$  Hz, 2H,  $o\text{-C}_6\text{H}_4\text{CH}_3$ ), 6.33 (dd,  $J = 7.8, 5.9$  Hz, 1H, H1'), 5.23 (dt,  $J = 6.5, 2.5$  Hz, 1H, H3'), 4.34 (d,  $J = 3.0$  Hz, 2H, H5'), 4.27 (q,  $J = 2.7$  Hz, 1H, H4'), 2.59 and 2.52 (2dd,  $J = 6.0, 2.4$  and  $5.8, 2.3$  Hz, 2H, H2'), 2.32 (s, 3H,  $\text{CH}_3$ ), 2.14 and 2.09 (2s, 2 × 3H, 2  $\text{COCH}_3$ );  $^{13}\text{C}$  { $^1\text{H}$ } (ppm, 50 MHz)<sup>S5</sup> 170.6, 170.3 (2  $\text{COCH}_3$ ), 161.5 (C4), 149.6 (C2), 141.3 (C6), 139.0 ( $i\text{-C}_6\text{H}_4\text{CH}_3$ ), 131.6 ( $m\text{-C}_6\text{H}_4\text{CH}_3$ ), 129.2 ( $o\text{-C}_6\text{H}_4\text{CH}_3$ ), 119.4 ( $p\text{-C}_6\text{H}_4\text{CH}_3$ ), 101.2 (C5), 94.0 ( $\text{C}=\text{CC}_6\text{H}_4$ ), 85.5 (C1'), 82.6 (C4'), 79.7 ( $\text{C}=\text{CC}_6\text{H}_4$ ), 74.2 (C3'), 64.0 (C5'), 38.2 (C2'), 21.6 ( $\text{CH}_3$ ), 21.0 ( $\text{COCH}_3$ ), 20.9 ( $\text{COCH}_3$ ).

#### Dicobalt hexacarbonyl 5-*p*-tolylethynyl-2'-deoxyuridine (**3a**).

A Schlenk flask was charged with **2a** (0.1016 g, 0.2968 mmol), THF (5 mL),  $\text{Co}_2(\text{CO})_8$  (0.2030 g, 0.5937 mmol). The mixture was stirred for 1.5 h. Solvent was removed by rotary evaporation and the red residue was dried by oil pump vacuum. The residue was dissolved in a minimum amount of  $\text{CHCl}_3/\text{CH}_3\text{OH}$ <sup>S3a</sup> (ca. 1 mL). Silica gel column chromatography (30 × 2 cm;  $\text{CHCl}_3/\text{CH}_3\text{OH}$ <sup>S3a</sup>) gave a red-brown fraction. Solvent was removed by rotary evaporation and the residue was dried by oil pump vacuum to give **3a** (0.1716 g, 0.2731 mmol, 92%) as a dark brown powder which was stored in a freezer at -18 °C. DSC ( $T_i/T_e/T_p$ )<sup>S6</sup> 114/125/140 °C (endothermic decomposition without melting). Calcd for  $\text{C}_{24}\text{H}_{18}\text{Co}_2\text{N}_2\text{O}_{11}$ : C, 45.88; H, 2.89. Found: C, 45.66; H, 3.36.  $R_f = 0.62$ .<sup>S3c</sup> IR ( $\text{cm}^{-1}$ , KBr)  $\text{NH}$  3428 s br,  $\text{OH}$  3166 w br,  $\text{C}=\text{C}$  2220 vw,  $\text{CoC}\equiv$  2092 s, 2055 vs, 2023 vs,  $\text{NC}=\text{O}$  1690 m br,  $\text{C}=\text{C}$  1605 sh,  $p\text{-C}_6\text{H}_4$  818 w. UV see Figure. MS<sup>S7</sup> (ES, MeOH + KCl, positive) 1295 ((2M + K)<sup>+</sup>, 36%), 667 ((M + K)<sup>+</sup>, 92%), 639 ((M + K - CO)<sup>+</sup>, 100%), 629 ((M + H)<sup>+</sup>, 12%), no other peaks above 90 of >9%; (negative) 1291 ((2M + Cl)<sup>-</sup>, 8%), 663 ((M + Cl)<sup>-</sup>, 100%), 635 ((M + Cl - CO)<sup>-</sup>, 18%), 627 ((M - H)<sup>-</sup>, 5%), 607 ((M + Cl - 2CO)<sup>-</sup>, 56%), 599 ((M - H

– CO)<sup>–</sup>, 16%), 579 ((M + Cl – 3CO)<sup>–</sup>, 63%), 571 ((M – H – 2CO)<sup>–</sup>, 20%), 551 ((M + Cl – 4CO)<sup>–</sup>, 61%), 543 ((M – H – 3CO)<sup>–</sup>, 32%), 515 ((M – H – 4CO)<sup>–</sup>, 12%); no other peaks above 270 of >5%.

NMR (acetone-*d*<sub>6</sub>): <sup>1</sup>H ( , 200 MHz) 10.32 (s, 1H, N3),<sup>S9</sup> 8.43 (s, 1H, H6), 7.53 (AB, *J* = 8.0 Hz, 2H, *m*-C<sub>6</sub>H<sub>4</sub>CH<sub>3</sub>),<sup>S10</sup> 7.19 (AB, *J* = 8.0 Hz, 2H, *o*-C<sub>6</sub>H<sub>4</sub>CH<sub>3</sub>), 6.43 (t, *J* = 6.9 Hz, 1H, H1'), 4.52 (br, 1H, OH5'),<sup>S9</sup> 4.43 (d, *J* = 2.7 Hz, 1H, OH3'),<sup>S9</sup> 4.24 (t, *J* = 4.5 Hz, 1H, H3'), 4.06-4.02 (m, 1H, H4'), 3.83-3.68 (m, 2H, H5'), 2.32 (s, 3H, CH<sub>3</sub>),<sup>S11</sup> 2.08-2.02 (m, 2H, H2'); <sup>13</sup>C{<sup>1</sup>H} (ppm, 50 MHz)<sup>S5</sup> 200.5 (CoCO), 160.8 (C4), 150.8 (C2), 139.8 (C6), 138.8 (*i* to C<sub>6</sub>H<sub>4</sub>CH<sub>3</sub>), 136.3 (*p* to C<sub>6</sub>H<sub>4</sub>CH<sub>3</sub>), 130.6 and 130.2 (*m* and *o* to C<sub>6</sub>H<sub>4</sub>CH<sub>3</sub>), 113.6 (C5), 89.2 (C4'), 86.4 (C1'), 96.7 and 86.2 (C – CC<sub>6</sub>H<sub>4</sub>), 73.1 (C3'), 63.3 (C5'), 41.9 (C2'), 21.4 (CH<sub>3</sub>).

### Dicobalt hexacarbonyl 3',5'-di-*O*-acetyl-5-*p*-tolylethynyl-2'-deoxyuridine (3b).

The procedure as for **3a** was carried out using **2b** (0.0523 g, 0.122 mmol), Co<sub>2</sub>(CO)<sub>8</sub> (0.0823 mg, 0.241 mmol) and THF (10 mL), which gave after column chromatography (CHCl<sub>3</sub>/MeOH gradient, 100:0->98:2->95:5) **3b** (0.0565 g, 0.0816 mmol, 66%) as a dark brown powder, m.p. 159-162 °C. Calcd for C<sub>28</sub>H<sub>22</sub>Co<sub>2</sub>N<sub>2</sub>O<sub>13</sub>: C, 47.21; H, 3.11. Found: C, 46.81; H, 3.43. R<sub>f</sub> = 0.49 (CHCl<sub>3</sub>/MeOH),<sup>S3a</sup> 0.57 (ethyl acetate/hexane).<sup>S3d</sup> IR (cm<sup>–1</sup>, CHCl<sub>3</sub>) NH 3435 w, OH 3132 w, CoC= 2094 s, 2058 vs, 2031 vs, C 1745 m, 1714 m, 1698 m, C=C 1698 m, *p*-C<sub>6</sub>H<sub>4</sub> 819 vw. MS<sup>S7</sup> (FAB, gly, positive) 713 ((M + 1)<sup>+</sup>, 10%), 629 ((M + 2 – 2CH<sub>3</sub>CO)<sup>+</sup>, 17%), 572 ((M + 3 – Co(CO)<sub>3</sub>)<sup>+</sup>, 100%), 545 ((M – 6CO)<sup>+</sup>, 36%), 427 ((M + 1 – Co<sub>2</sub>(CO)<sub>6</sub>)<sup>+</sup>, 40%); 344 (41%), no other peaks above 290 of >22%; (negative) 684 ((M – CO)<sup>–</sup>, 100%), 652 ((M – 2CO)<sup>–</sup>, 18%), 628 ((M – 3CO)<sup>–</sup>, 62%), 600 ((M – 4CO)<sup>–</sup>, 29%), 572 ((M – 5CO)<sup>–</sup>, 13%), 544 ((M – 6CO)<sup>–</sup>, 11%), 425 (22%); no other peaks above 260 of >13%.

NMR (CDCl<sub>3</sub>): <sup>1</sup>H ( , 200 MHz) 9.73 (s, 1H, N3), 7.91 (s, 1H, H6), 7.43 (AB, *J* = 7.8 Hz, 2H, *m*-C<sub>6</sub>H<sub>4</sub>CH<sub>3</sub>),<sup>S10</sup> 7.16 (AB, *J* = 7.8 Hz, 2H, *o*-C<sub>6</sub>H<sub>4</sub>CH<sub>3</sub>), 6.32 (dd, *J* = 8.6, 5.1 Hz, 1H, H1'), 5.14 (d, *J* = 5.7, 1H, H3'), 4.38-4.22 (m, 2H, H5'), 4.17-4.02 (m, 1H, H4'), 2.56 (dd, *J* = 14.0, 4.9 Hz, 2H, H2'), 2.35 (s, 3H, CH<sub>3</sub>), 2.12 and 1.81 (2s, 2 × 3H, 2 COCH<sub>3</sub>); <sup>13</sup>C (ppm, 50 MHz) 199.2 (s, CoCO), 170.5, 170.3 (m, 2 COCH<sub>3</sub>), 160.8 (d, *J* = 9.5 Hz, C4), 150.0 (d, *J* = 8.7 Hz, C2), 138.5 (m, *i*-C<sub>6</sub>H<sub>4</sub>CH<sub>3</sub>), 135.4 (dd, *J* = 180.4, 2.7 Hz, C6), 135.2 (t, *J* = 8.1 Hz, *p*-C<sub>6</sub>H<sub>4</sub>CH<sub>3</sub>), 129.8 (dq, *J* =

159.2, 5.7 Hz, *o*-C<sub>6</sub>H<sub>4</sub>CH<sub>3</sub>), 129.3 (dd, *J* = 159.4, 6.2 Hz, *m*-C<sub>6</sub>H<sub>4</sub>CH<sub>3</sub>), 113.8 (d, *J* = 3.9 Hz, C5), 93.6 (td, *J* = 7.7, 2.8 Hz, C-CC<sub>6</sub>H<sub>4</sub>), 85.5 (dm, *J* = 170.8 Hz, C1'), 82.5 (dm, *J* = 149.6 Hz, C4'), 81.1 (C-CC<sub>6</sub>H<sub>4</sub>), <sup>12</sup>C 74.4 (dm, *J* = 162.0 Hz, C3'), 63.9 (td, *J* = 148.5, 1.7 Hz, C5'), 38.1 (dd, *J* = 139.4, 131.3 Hz, C2'), 21.5 (qt, *J* = 126.4, 4.2 Hz, CH<sub>3</sub>), 21.1 (q, *J* = 130.0 Hz, COCH<sub>3</sub>), 20.4 (q, *J* = 129.8 Hz, COCH<sub>3</sub>).

## References and Notes

(S1) In response to conventions proposed in a review (Connelly, N. G.; Geiger, W. E. *Chem. Rev.* **1996**, *96*, 877), we present our CV data relative to a new E<sup>o</sup> value for ferrocene (0.46 V).

(S2) Chang, P. K.; Welch, A. D. *J. Med. Chem.* **1963**, *6*, 428-430.

(S3) Solvents for column chromatography and TLC (v/v): a) 95:5, b) 85:15, c) 80:20, d) 50:50.

(S4) Assignment based in part on the trends for **2a**.

(S5) A <sup>13</sup>C NMR spectrum of **2a** and **3b** were recorded without proton decoupling (gated decoupling). From intensity relationships and the magnitude of the coupling to the methyl protons, the signals were assigned as ipso, ortho, meta, and para to the methyl group. These chemical shift trends were used to assign resonances for the other *p*-tolyl containing compounds, **2b** and **3a**, respectively.

(S6) T<sub>i</sub>, initial peak temperature; T<sub>e</sub>, extrapolated peak-onset temperature; T<sub>p</sub>, maximum peak temperature; Cammenga, H. K.; Epple, M. *Angew. Chem.* **1995**, *107*, 1284-1301; *Angew. Chem., Int. Ed. Engl.* **1995**, *34*, 1171-1187.

(S7) *m/z* for most intense peak of isotope envelope; relative intensities are for the specified mass range; matrix peaks omitted; gly = glycerol.

(S8) UV-visible spectra were recorded in CH<sub>2</sub>Cl<sub>2</sub>, and absorbances are in nm ( , M<sup>-1</sup>cm<sup>-1</sup>).

(S9) Coupling pattern or signal observed only when the NMR tube was filled in anhydrous conditions.

(S10) The *p/m/o/i* positions are assigned with respect to the CH<sub>3</sub> group.

(S11) H2' signal obscured by CH<sub>3</sub>.

(S12) C signal obscured by C1', chemical shift from <sup>13</sup>C{<sup>1</sup>H} spectrum.

Expanded COSY ( $^1\text{H}$ -2D) Counter Plot for **2a**

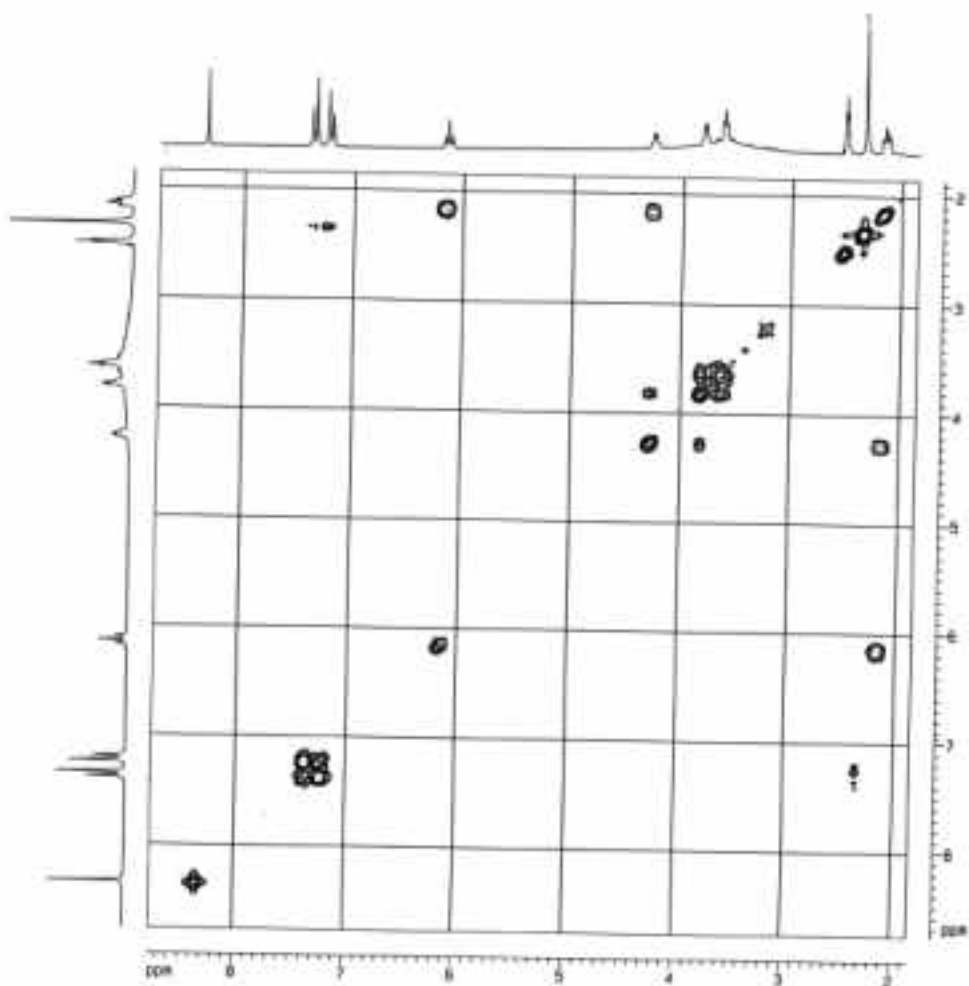

<sup>1</sup>H NMR spectrum for **3a** (acetone-*d*<sub>6</sub>)

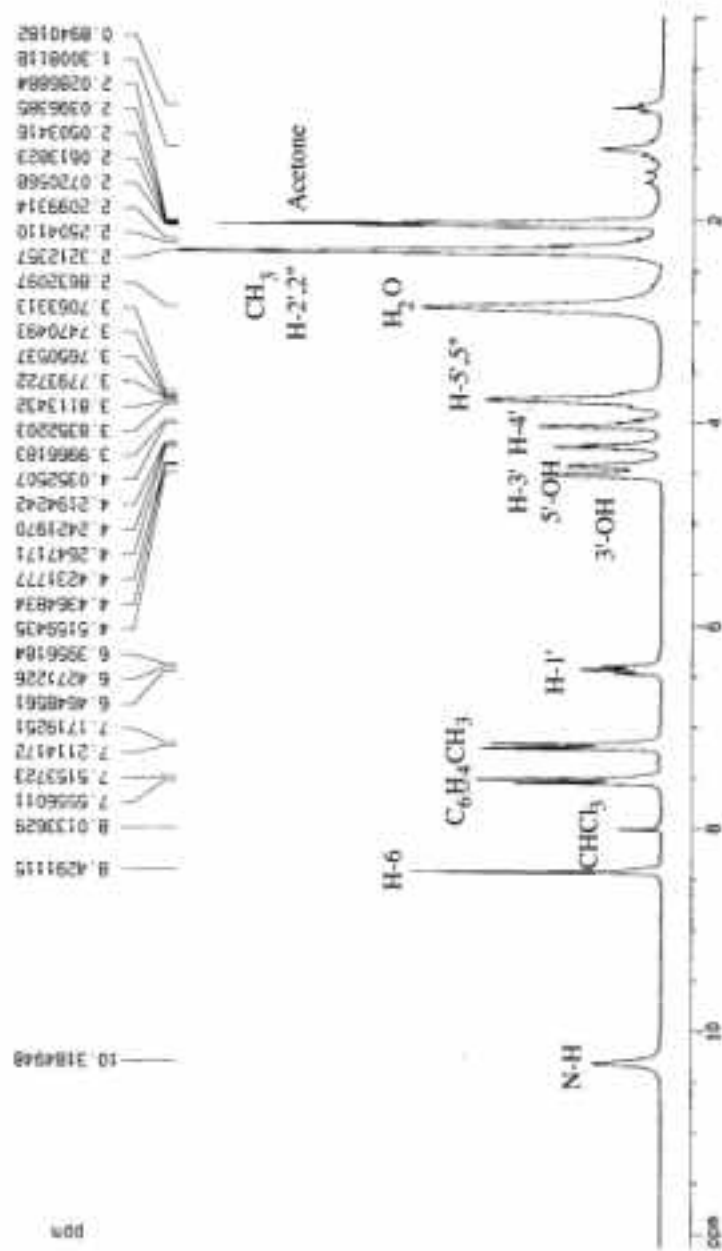

Current Data Parameters  
NAME RD 3007  
EXPNO 104  
PROCNO 1

F2 - Acquisition Parameters  
Date\_ 20010529  
Time 15.34  
INSTRUM spect  
PROBHD 5 mm QNP 1H-B  
PULPROG zgpg30  
TD 20  
FIDRES 0.152  
SOLVENT acetone  
NS 16  
DS 0  
SWH 2504.167 Hz  
FIDRES 0.317981 Hz  
AQ 1.5729140 sec  
RG 51.2  
DM 192.000 usec  
DE 0.00 usec  
TE 300.2 K  
D1 0.00000000 sec

\*\*\*\*\* CHANNEL f1 \*\*\*\*\*  
NUC1 1H  
P1 10.00 usec  
PL1 -3.00 dB  
SFO1 200.1312098 MHz

F2 - Processing parameters  
SI 16384  
SF 200.1300071 MHz  
WDW EM  
SSB 0  
LB 0.35 Hz  
GB 0  
RC 1.50

1D NMR plot parameters  
CX 20.00 usec  
F3P 12.126 usec  
F1 2426.81 Hz  
F2 -0.010 usec  
F2 -2.52 Hz  
NUC2 13C  
P2 0.00000000 sec  
SFO2 125.7611313 MHz

$^{13}\text{C}$  ( $^1\text{H}$ ) NMR spectrum for **3a** (acetone- $d_6$ )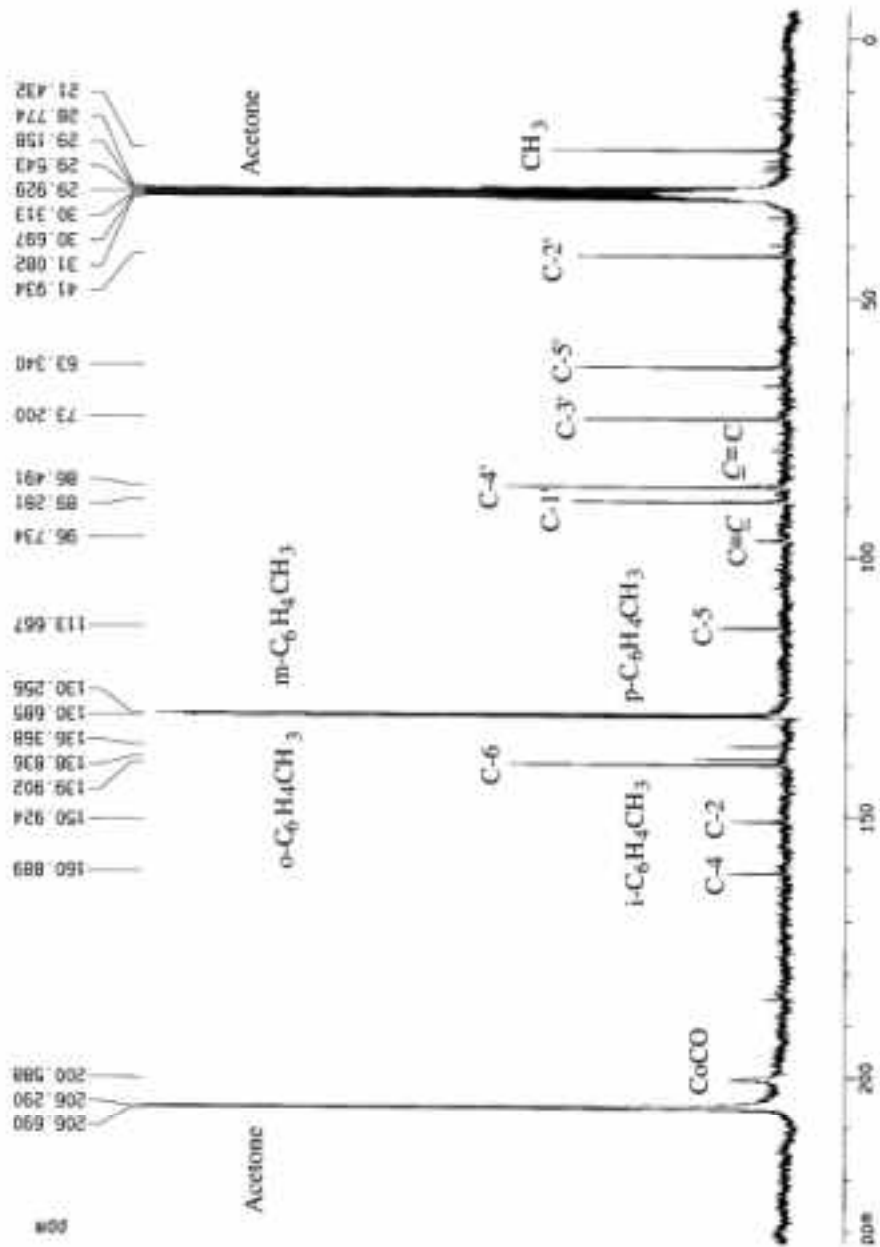

```

Current Data Parameters
MAC          00 00 00
EXPAN        100
PAC250      1

F2 - Acquisition Parameters
Sels:       20000000
Tune        9.38
INSTRUM     spect
PAC1000     9.38 MHz 11-B
PAC1000     1000
T0          20124
SOLVENT     DMSO
NS          10000
DS          2
SWH         10000 R14.1W
FIDRES      0.500000 Hz
AQ          0.3000000 sec
RG          64
DS          30.000 LSEC
DE          0.00 LSEC
TE          300.2 K
D1          0.0000000 sec
D11         0.3000000 sec

***** CHANNEL F1 *****
NUC1         13C
P1           0.00 sec
PL1          -3.30 dB
RG1         10.120000 sec

***** CHANNEL F2 *****
CHOP942      10
PC942        10
NUC2         13C
RG2          10
PL2          -3.00 dB
PL12         10.00 dB
RG12         200.100000 sec

F2 - Processing Parameters
SI          16384
SF          50.000000 MHz
AQ          0
DS          0
SWH         0.00 Hz
GB          0
GB1         0
GB2         1.00
PC          1.00

10 MHz g101 parameters
CA          20.00 cm
F1F         200.100 MHz
F2F         1000.10 MHz
F2F1        -5.430 MHz
F2F2        -27.164 Hz
PC942       11.000000 sec
RG942       200.100000 MHz

```

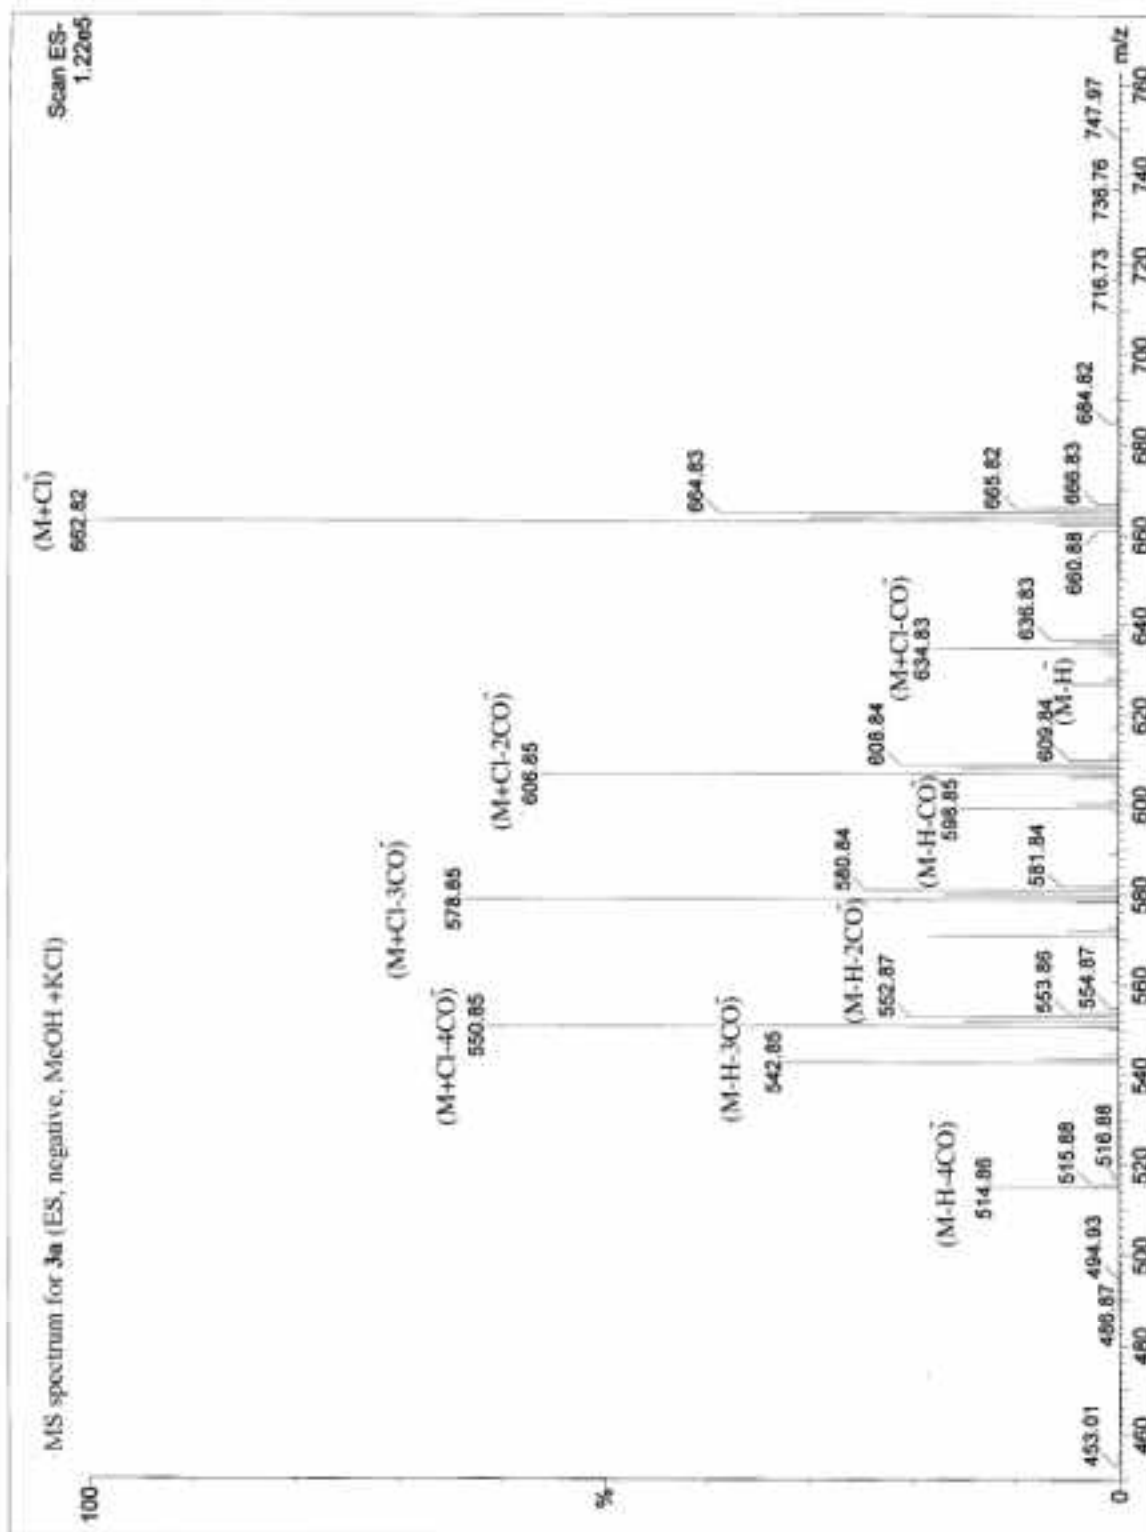

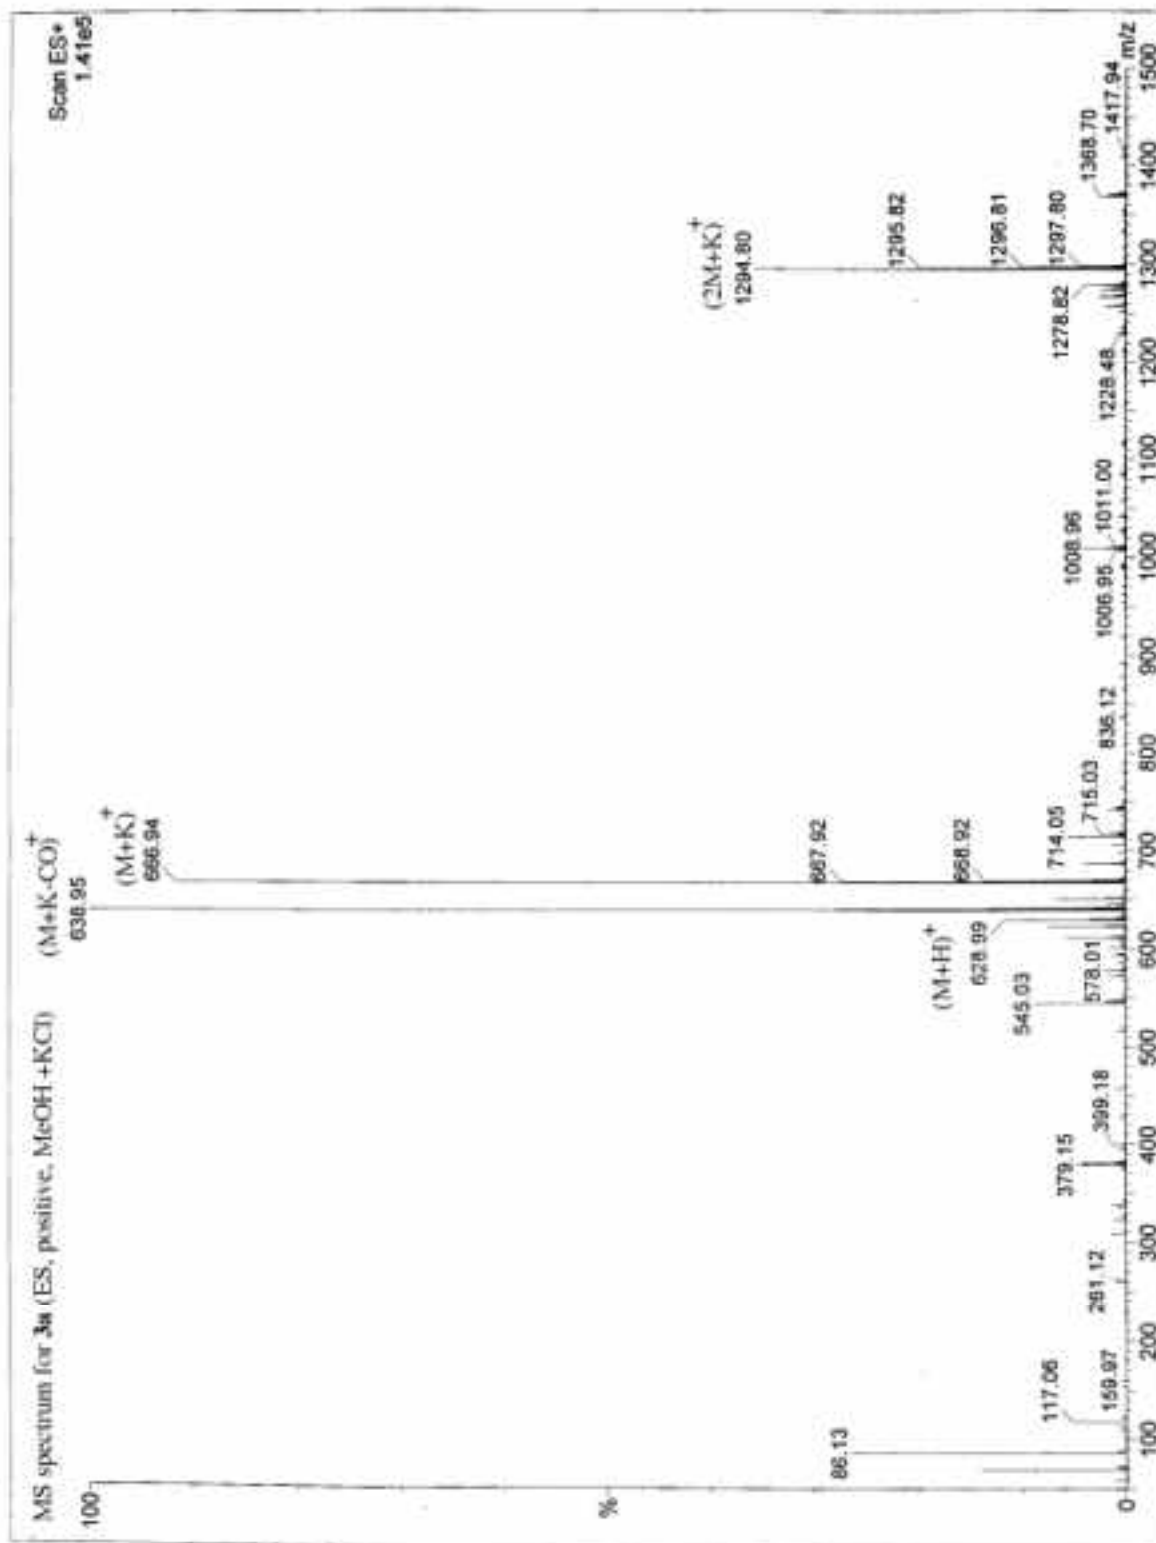

Cyclic Voltammograms of **3a** and **3b** (0.1 M Bu<sub>4</sub>N<sup>+</sup>BF<sub>4</sub><sup>-</sup>/CH<sub>2</sub>Cl<sub>2</sub> at 22.5 °C)

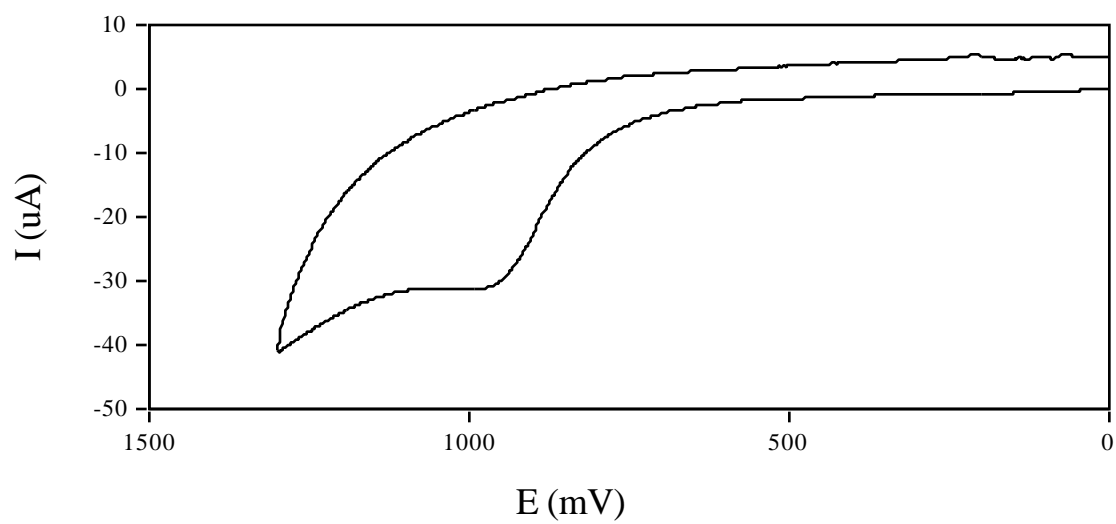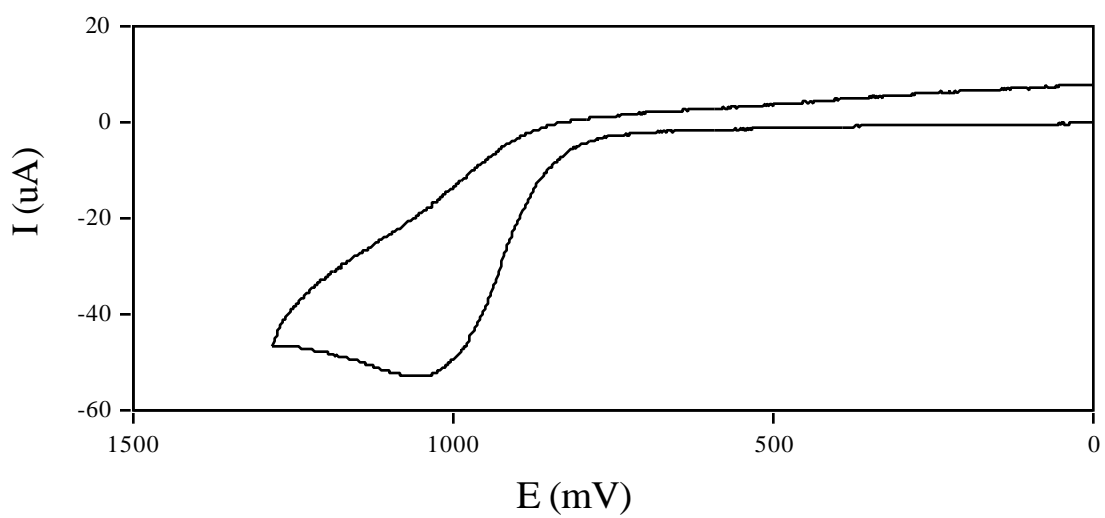

Supplement: b109501c.pdf [file b109501c.pdf]
